# Supplementary material for: Molecular engineering of push-pull chromophore for efficient bulk-heterojunction morphology in solution processed small molecule organic photovoltaics
Source: Royal Society of Chemistry journal article supplement (doi:10.1039/c1jm10667h), 2011-01-01
Supplement: c1jm10667h.pdf [file c1jm10667h.pdf]

## Supporting Information

# Molecular Engineering of Push-Pull Chromophore for Efficient Bulk-Heterojunction Morphology in Solution Processed Small Molecule Organic Photovoltaics

Haye Min Ko<sup>a</sup>, Hyunbong Choi<sup>a</sup>, Sanghyun Paek<sup>a</sup>, Kyungjun Kim<sup>a</sup>, Kihyung Song<sup>b</sup>, Jae Kwan Lee<sup>c</sup> and Jaejung Ko<sup>a,\*</sup>

<sup>a</sup> Department of Advanced Material Chemistry, Korea University, Chungnam, 330-700, Korea, E-mail: [jko@korea.ac.kr](mailto:jko@korea.ac.kr); Fax: +82-41-860-5396; Tel: +82-41-860-1337

<sup>b</sup> Department of Chemistry, Korea National University of Education, Chungbuk 363-791, Korea

<sup>c</sup> Department of Green Energy Engineering & Research Center for Convergence Technology, Hoseo University, Chungnam, 336-795, Korea

\*Corresponding Author; e-mail: [jko@korea.ac.kr](mailto:jko@korea.ac.kr)

(a)

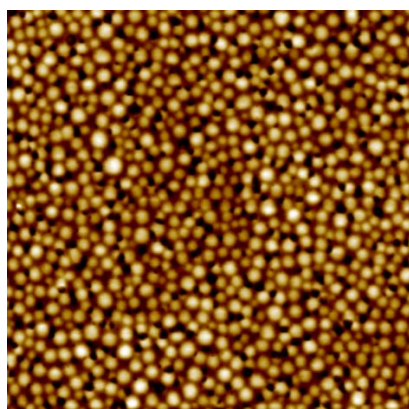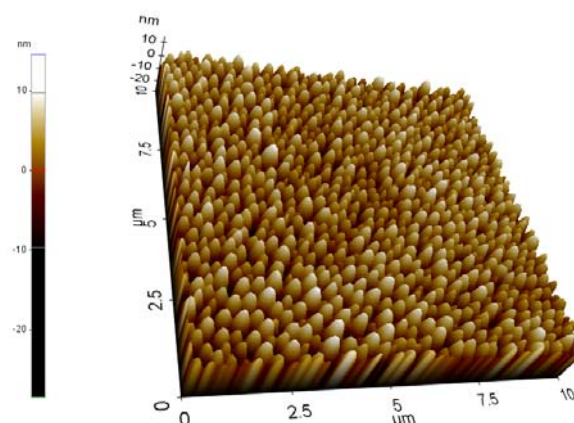

(b)

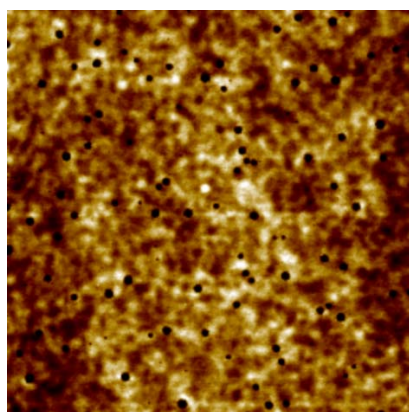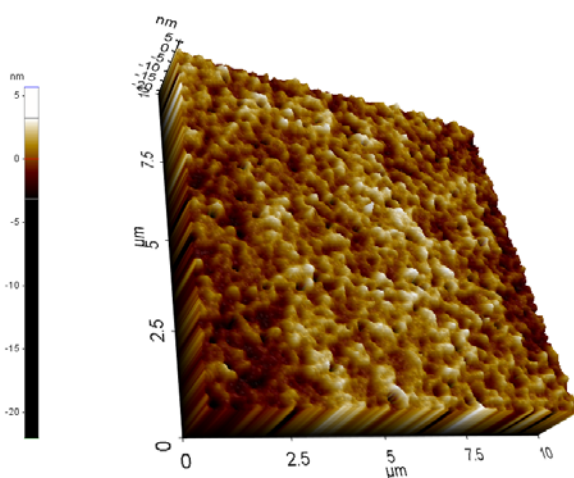

(c)

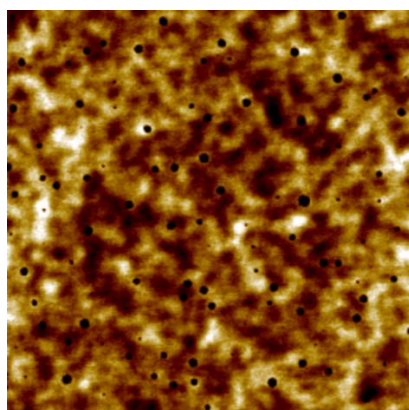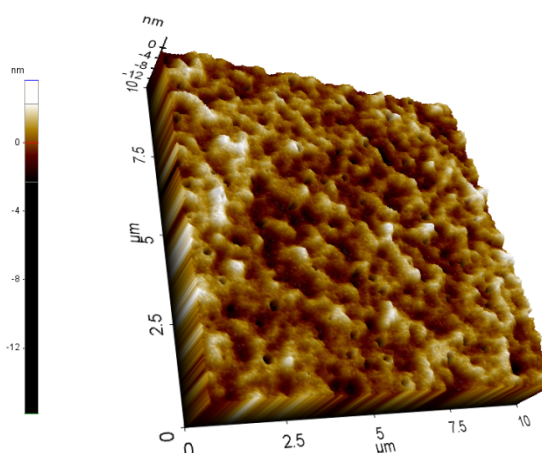

**Figure S1.** Tapping mode AFM surface topography of films cast from of (a) **bisDMFA-diTh-CA/C<sub>71</sub>-PCBM** BHJ composite, (b) **bisDMFA-diTh-MMN/C<sub>71</sub>-PCBM** BHJ composite annealed and (c) **bisDMFA-diTh-MIMN/C<sub>61</sub>-PCBM** BHJ composite annealed.
